# Supplementary figures and images for: Electronic structure and thermoelectric properties of Zintl compounds A3AlSb3(A = Ca and Sr): first-principles study
Source: Royal Society of Chemistry journal article supplement (doi:10.1039/c5ra09804a), 2015-01-01

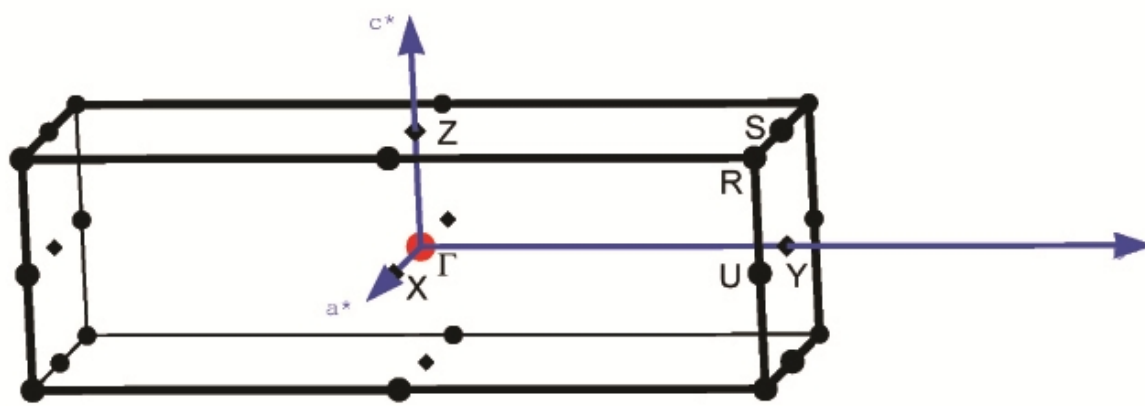

Supplement: c5ra09804a1.pdf [file c5ra09804a1.pdf]
